# Supplementary material for: White‐Light‐Emitting Melamine‐Formaldehyde Microspheres through Polymer‐Mediated Aggregation and Encapsulation of Graphene Quantum Dots
Source: PubMed Central journal article supplement (PMC6343069; doi:10.1002/advs.201801432), 2018-11-22
Supplement: ADVS-6-1801432-s001.pdf [file ADVS-6-1801432-s001.pdf]

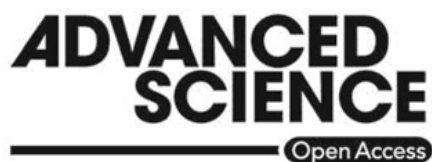

## Supporting Information

for *Adv. Sci.*, DOI: 10.1002/advs.201801432

White-Light-Emitting Melamine-Formaldehyde Microspheres  
through Polymer-Mediated Aggregation and Encapsulation of  
Graphene Quantum Dots

*Youshen Wu, Hui Zhang, Aizhao Pan, Qi Wang, Yanfeng  
Zhang, Guijiang Zhou, and Ling He\**

## Supporting Information

### **White-light-emitting melamine-formaldehyde microspheres through polymer mediated aggregation and encapsulation of graphene quantum dots**

Youshen Wu, Hui Zhang, Aizhao Pan, Qi Wang, Yanfeng Zhang, Guijiang Zhou and Ling He\*

Dr. Y. Wu, Dr. A. Pan, Q. Wang, Dr. Y. Zhang, Prof. G. Zhou, Prof. L. He  
Department of Chemistry, School of Science, Xi'an Jiaotong University, Xi'an 710049, P. R. China

E-mail: [Heling@mail.xjtu.edu.cn](mailto:Heling@mail.xjtu.edu.cn)

Dr. H. Zhang

Key Laboratory of Biomedical Information Engineering of Education Ministry, Xi'an Jiaotong University, Xi'an 710049, P. R. China

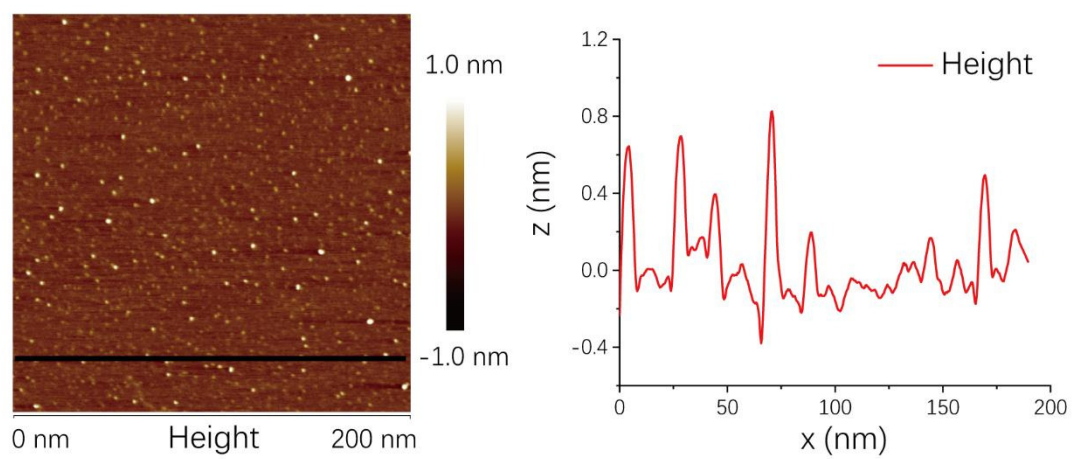

**Figure S1.** AFM image and topographic heights of the GQDs.

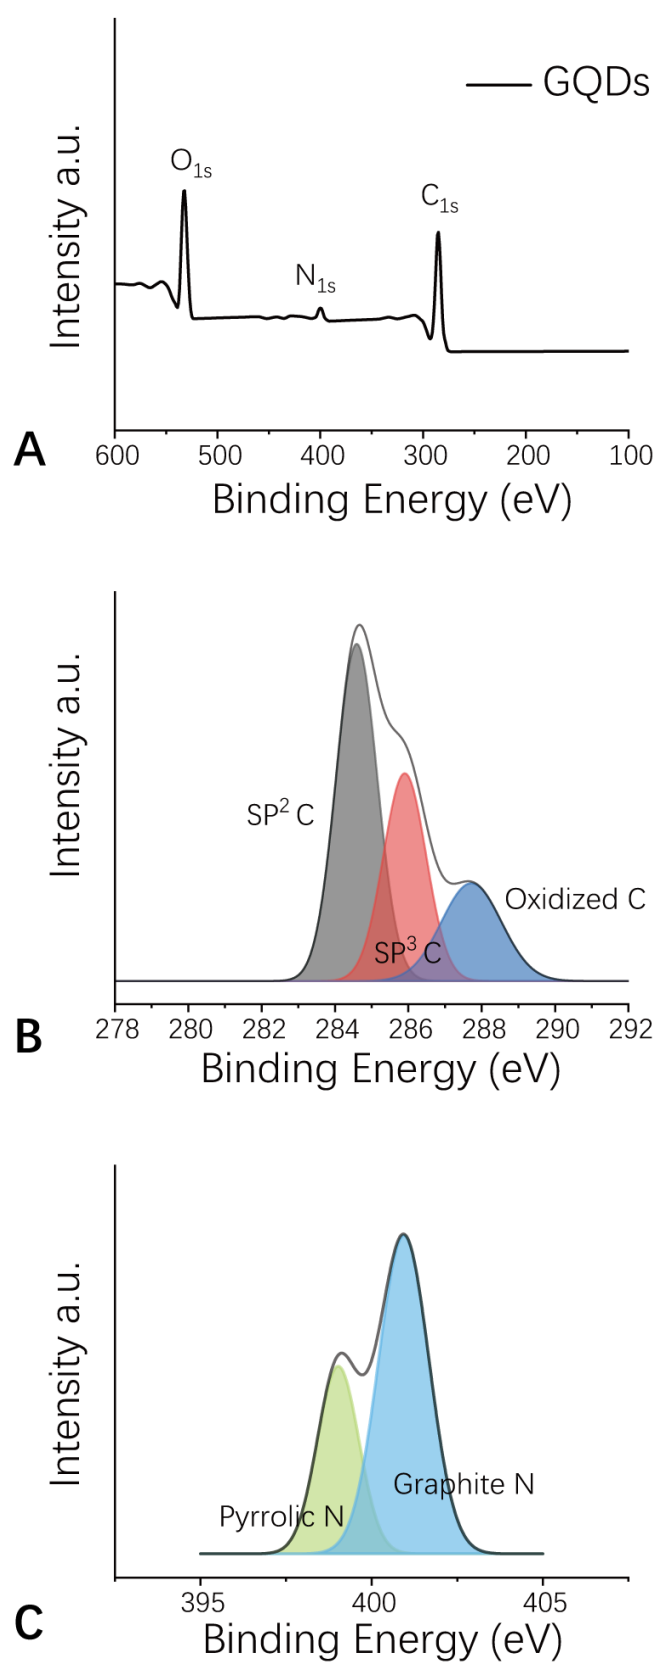

**Figure S2.** XPS spectra (full survey, C<sub>1s</sub>, N<sub>1s</sub>, O<sub>1s</sub>) of the GQDs (A). Deconvoluted XPS spectra for C<sub>1s</sub> (B) and N<sub>1s</sub> (C).

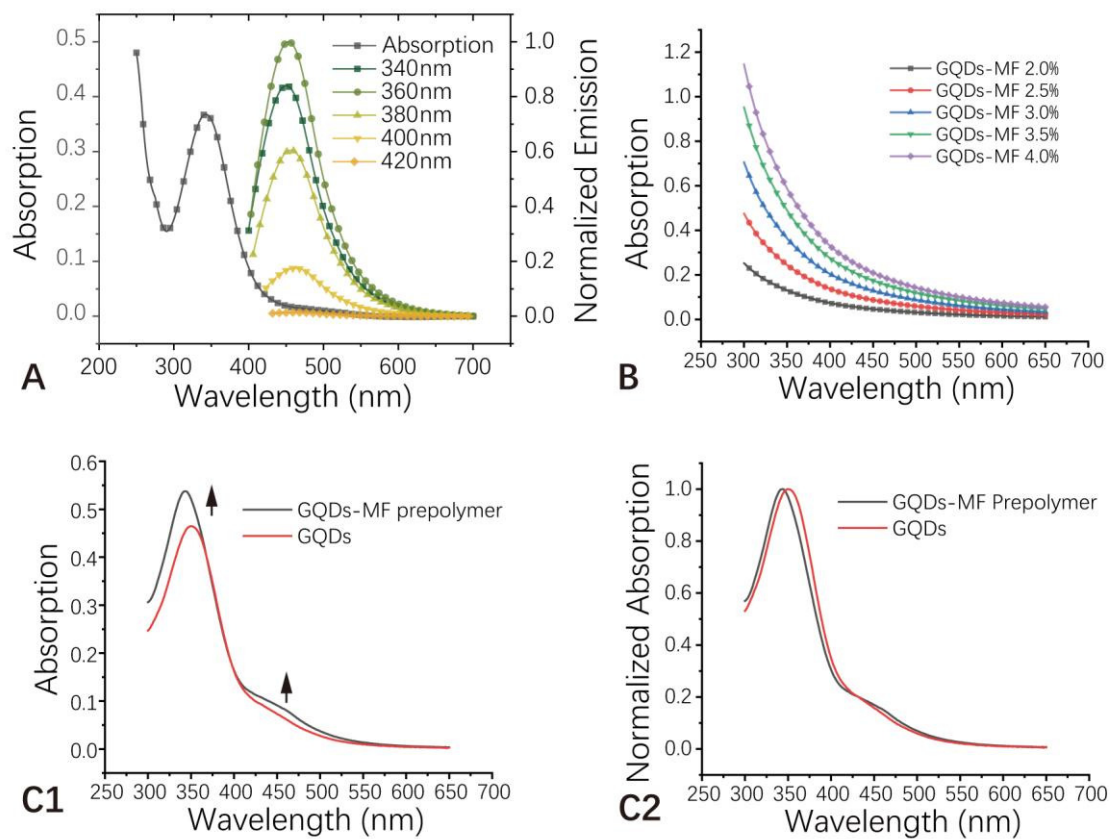

**Figure S3.** UV-Vis absorption and fluorescence spectra of the GQDs solution, excited at different wavelengths (A). UV-Vis absorptions of the series of GQDs-microspheres (B), the GQDs solution (0.1% wt.) and of the GQDs-MF prepolymer mixture (C1 and C2).

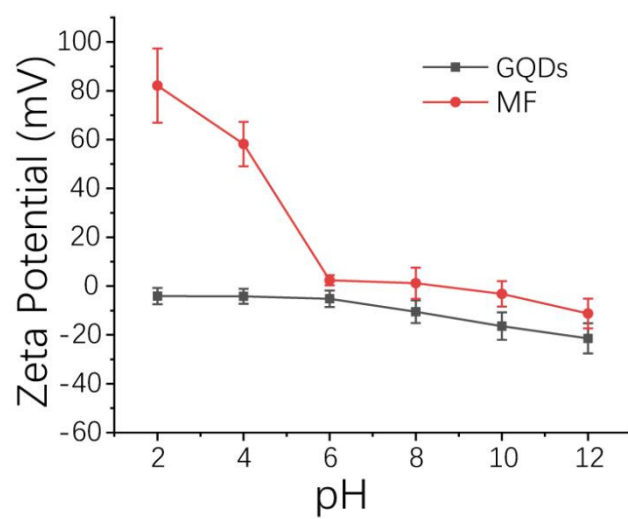

**Figure S4.** pH-zeta potential curves of GQDs and MF prepolymer in aqueous solutions

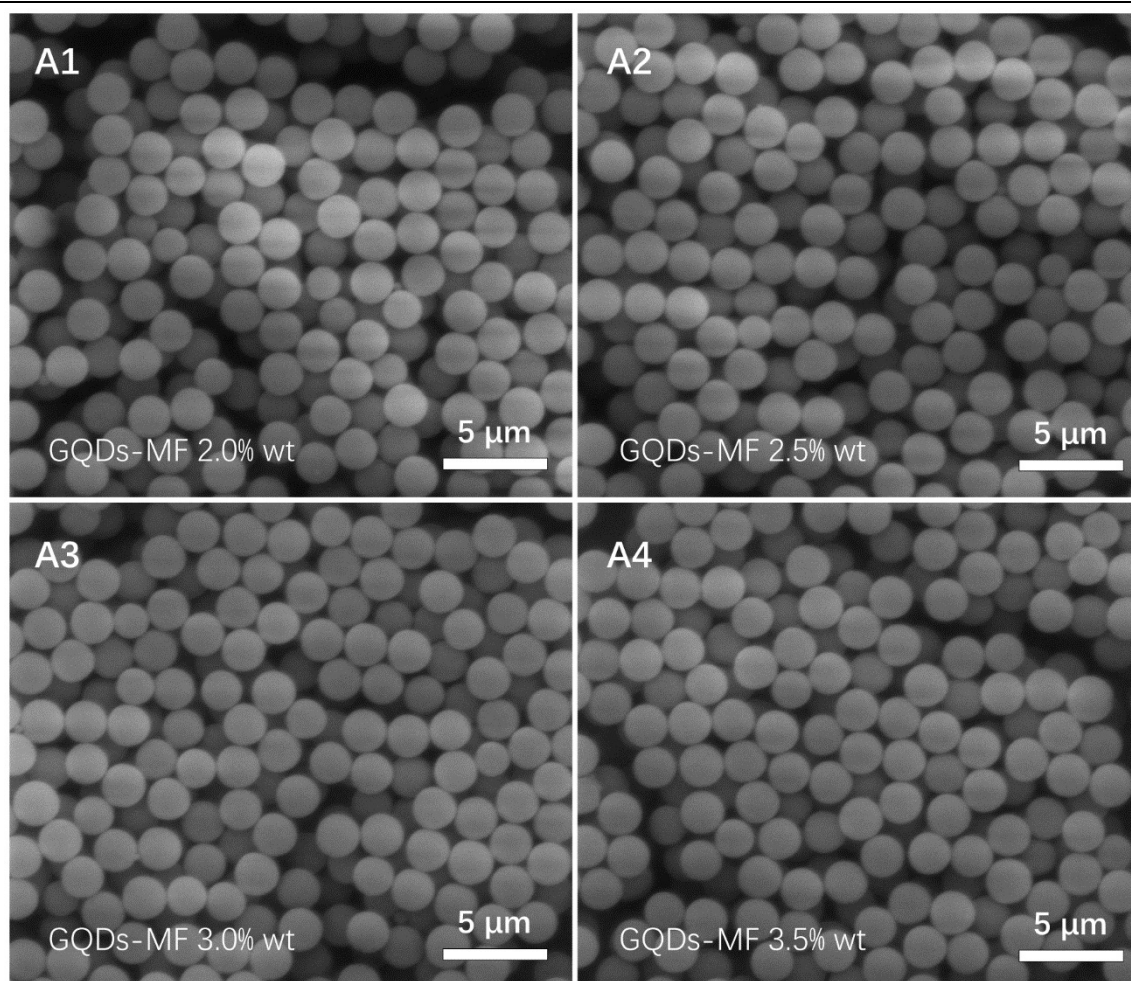

**Figure S5.** SEM images of GQDs-MF microsphere samples prepared with varied GQDs doping concentrations.

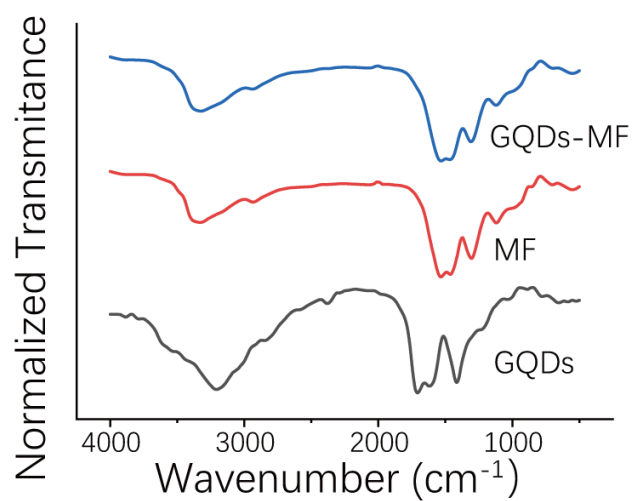

**Figure S6.** FTIR spectra of the GQDs, GQDs-MF microspheres and blank MF microspheres.



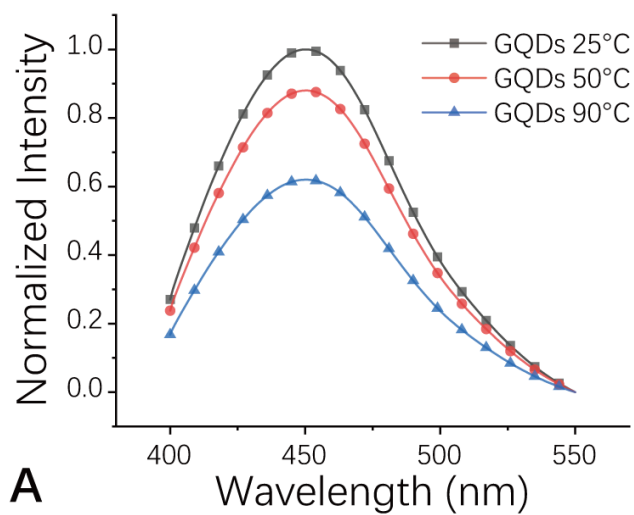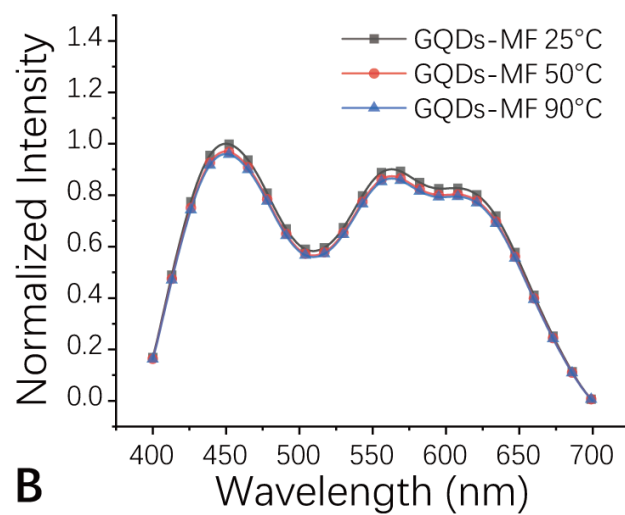

**Figure S7.** Emissions spectra of the GQDs solution (A) and aqueous suspension of GQDs-MF microspheres at varied temperatures, excited by 360 nm.

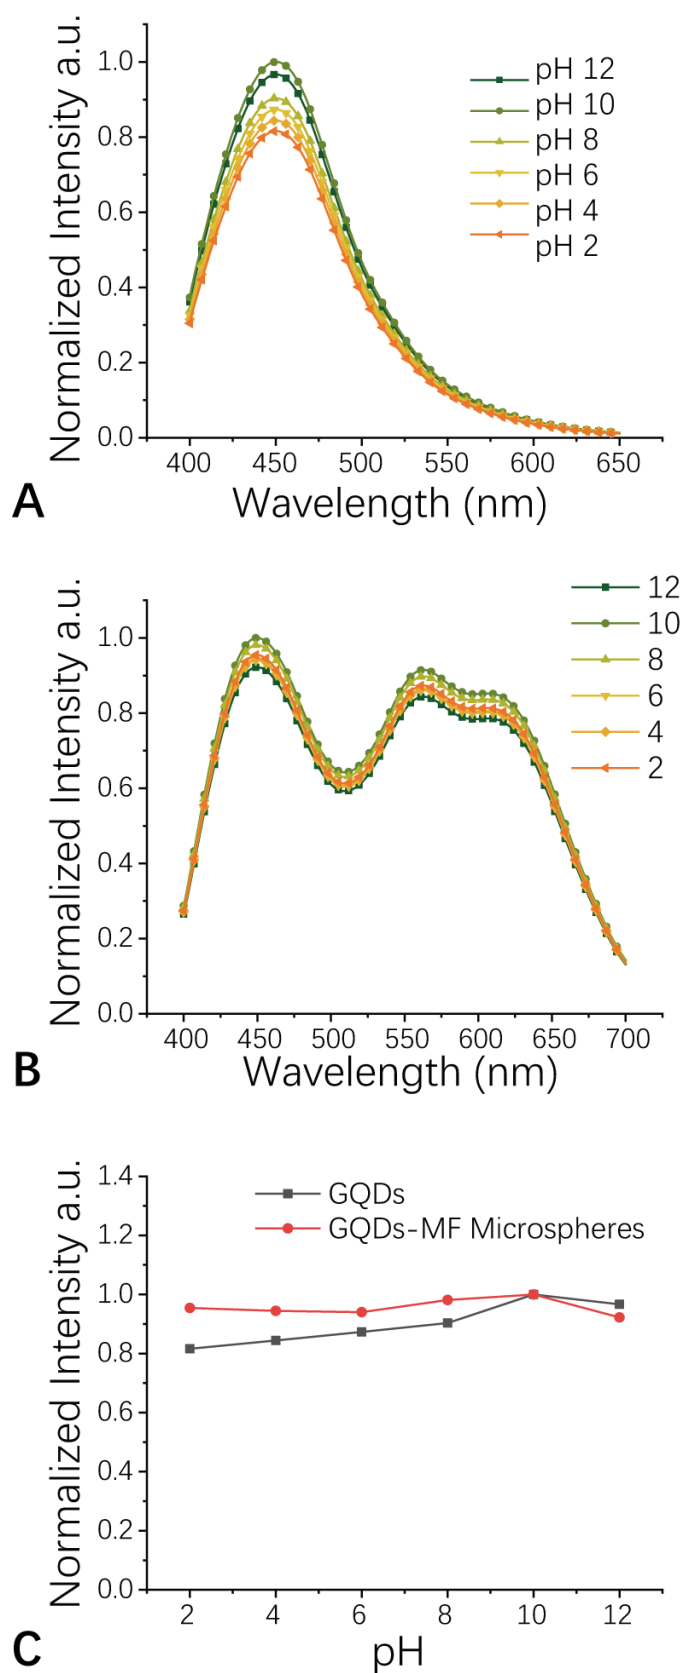

**Figure S8.** Emission spectra and maximum emission intensity of the GQDs solution and aqueous suspension of GQDs-MF microspheres in solutions of different pH, excited at 360 nm.

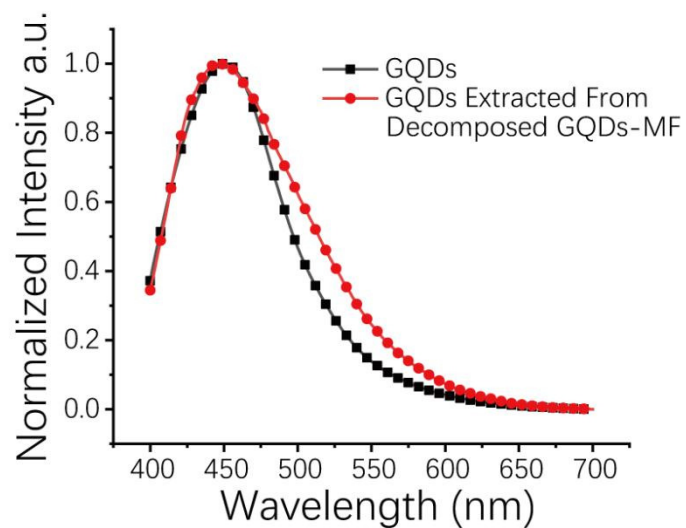

**Figure S9.** Emission spectra of the GQDs and GQDs extracted from the decomposed GQDs-MF microspheres, the spectra are normalized by maximum intensity, excited at 360 nm.

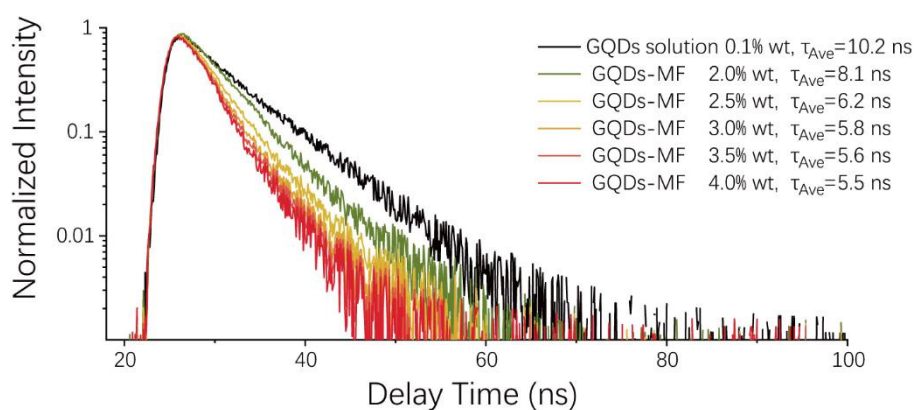

**Figure S10.** Time-resolved luminescence decay curves of the GQDs solution and series of GQDs-MF microspheres. The emissions were collected at 450 nm, excited at 340 nm.

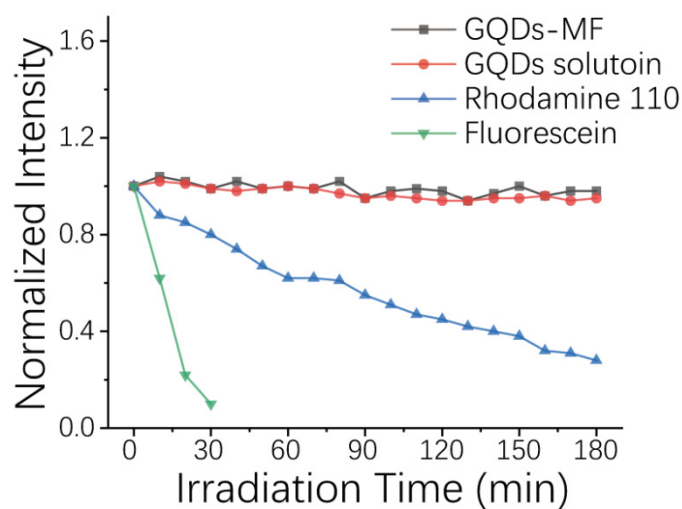

**Figure S11.** A comparison of the photo-stability of the GQDs solution, GQDs-MF microspheres, Rhodamine 110, and Fluorescein, under UV irradiation by a 300W high pressure mercury lamp

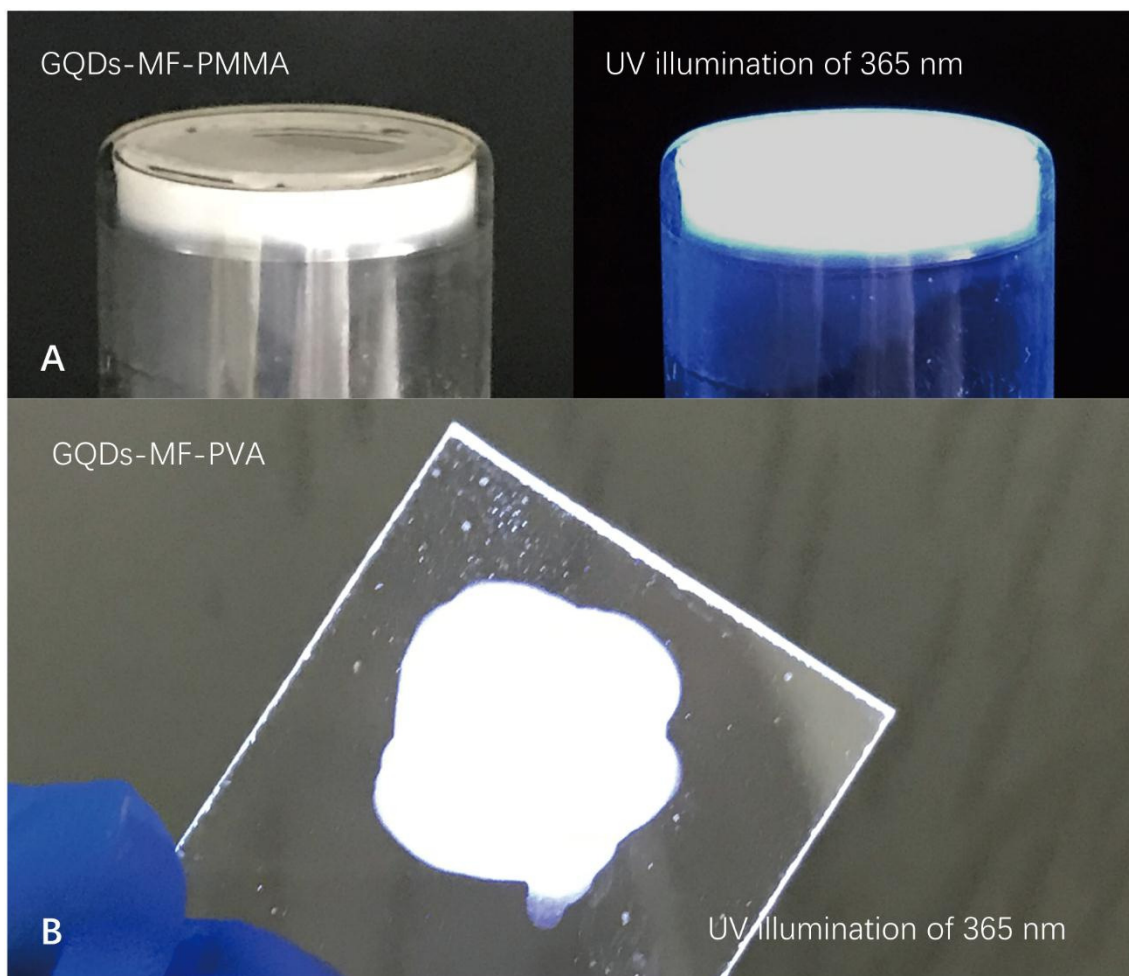

**Figure S12.** White-light-emitting block and film prepared with GQDs-MF-PMMA and GQDs-MF-PVA materials.

**Table S1.** QY, CCT, CRI and CIE coordinates for the GQDs solution and GQDs-MF microspheres prepared with different GQDs doping concentrations.

| Doping Concentration | QY   | CCT (K) | CRI  | CIE          |
|----------------------|------|---------|------|--------------|
| 0.1% wt solution     | 0.55 | NA      | NA   | (0.16, 0.14) |
| 2.0% wt.             | 0.83 | 10810   | 0.75 | (0.28, 0.28) |
| 2.5% wt.             | 0.74 | 7814    | 0.81 | (0.30, 0.29) |
| 3.0% wt.             | 0.62 | 6653    | 0.84 | (0.31, 0.31) |
| 3.5% wt.             | 0.51 | 5969    | 0.87 | (0.32, 0.32) |
| 4.0% wt.             | 0.43 | 5638    | 0.88 | (0.33, 0.32) |

**Table S2.** A comparison of some recently developed GQDs based white-light-emitting materials.

| <b>Author and Date</b>        | <b>CIE</b>                                                                        | <b>CRI</b> | <b>QY</b> | <b>EQE</b>      | <b>Ref.</b> |
|-------------------------------|-----------------------------------------------------------------------------------|------------|-----------|-----------------|-------------|
| <b>This work</b>              | (0.28, 0.28);<br>(0.30, 0.29);<br>(0.31, 0.31);<br>(0.32, 0.32);<br>(0.33, 0.32); | 0.75-0.88  | 43-83%    | NA              | This work   |
| <b>P. Dong et. al. 2017</b>   | (0.33, 0.36)                                                                      | 83.9       | 3.62%     | NA              | 23          |
| <b>Z. Luo et. al. 2016</b>    | (0.24, 0.25);<br>(0.25, 0.27);<br>(0.26, 0.28);<br>(0.27, 0.29)                   | NA         | NA        | 0.24 -<br>0.19% | 46          |
| <b>T. Ghosh et. al. 2015</b>  | (0.29, 0.34)                                                                      | NA         | 1-2%      | NA              | 25          |
| <b>R. Sekiya et. al. 2014</b> | (0.24, 0.27);<br>(0.34, 0.40);<br>(0.34, 0.39);<br>(0.32, 0.38)                   | NA         | 1-2%      | NA              | 21          |
| <b>C.M. Luk et. al. 2012</b>  | (0.33, 0.38)                                                                      | 72.0       | 12%       | NA              | 24          |
